# Supplementary material for: Green approach for the fabrication of a ternary nanocatalyst (Ag-ZnONPs@Cy) for visible light-induced photocatalytic reduction of nitroarenes to aminoarenes
Source: Royal Society of Chemistry journal article supplement (doi:10.1039/d3ra06448d), 2023-01-01
Supplement: d3ra06448d1.pdf [file d3ra06448d1.pdf]

## Supporting Information

### Green Approach for the Fabrication of a Ternary Nanocatalyst (Ag-ZnONPs@Cy) for Visible Light-induced Photocatalytic Reduction of Nitroarenes to Aminoarenes

Dana A. Kader<sup>a,b,\*</sup>

<sup>a</sup>Department of Chemistry, College of Education, University of Sulaimani, Old Campus, 46001, Kurdistan Region, Iraq

<sup>b</sup>Pharmacy Department, Komar University of Science and Technology, Sulaimani 46001, Kurdistan Region, Iraq

\***Corresponding author:** Dana A. Kader, Department of Chemistry, College of Education, University of Sulaimani, Old Campus, 46001, Kurdistan Region, Iraq. e-mail address: [dana.kader@univsul.edu.iq](mailto:dana.kader@univsul.edu.iq)

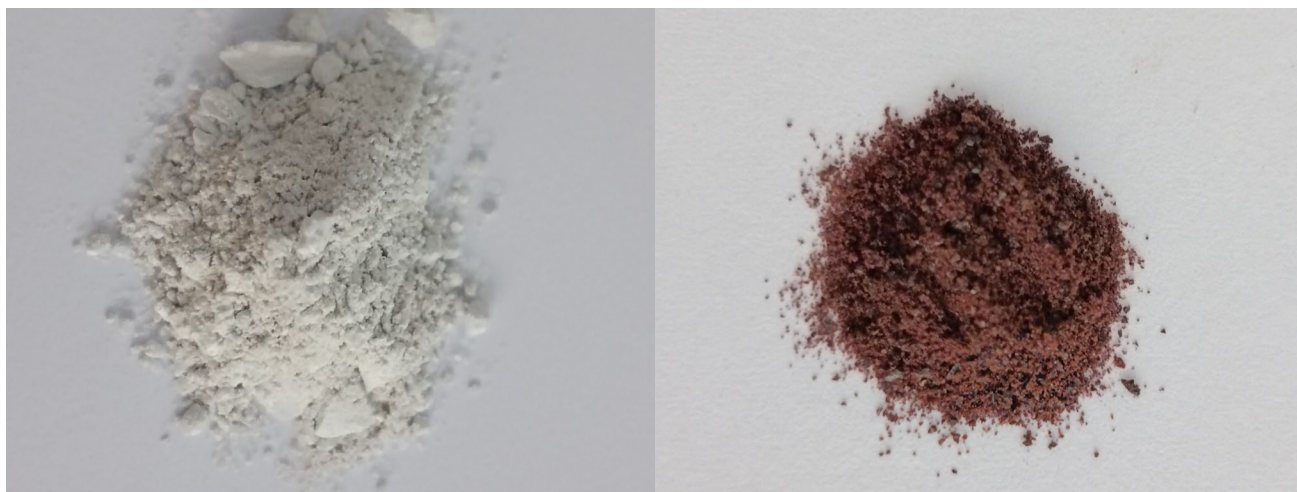

**Figure S1:** The powder form of Ag-ZnONPs (white) and Ag-ZnONPs@Cy (reddish-brown), respectively

## Analytical data, $^1\text{H}$ -NMR and $^{13}\text{C}$ -NMR spectra

**Aniline (1b):** Pale Brown liquid (91 mg, 98%).  $^1\text{H}$  NMR (400 MHz,  $\text{CDCl}_3$ )  $\delta$  (ppm) 7.18 (t,  $J=7.2$  Hz, 2 H), 6.63 (t,  $J=7.2$  Hz, 1 H), 6.45 (d,  $J=7.4$  Hz, 2H), 3.44 (br s, 2H).  $^{13}\text{C}$  NMR (100 MHz,  $\text{CDCl}_3$ )  $\delta$  (ppm) 115.5, 118.3, 129.4, 146.4.

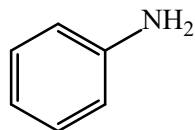

**4-bromoaniline (2b):** Brown solid (165 mg, 96%). Melting point = 57-60 °C.  $^1\text{H}$  NMR (400 MHz,  $\text{CDCl}_3$ )  $\delta$  (ppm) 7.22 (d,  $J=8.4$  Hz, 2H), 6.54 (d,  $J=8.4$  Hz, 2H), 3.66 (br s, 2H).  $^{13}\text{C}$  NMR (100 MHz,  $\text{CDCl}_3$ )  $\delta$  (ppm) 110.5, 116.5, 132.3, 145.5.

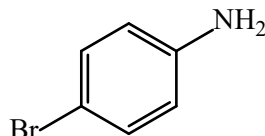

**2-Bromo-3-methylaniline (3b):** brownish-yellow liquid (165 mg, 89%).  $^1\text{H}$  NMR (400 MHz,  $\text{CDCl}_3$ )  $\delta$  (ppm) 7.04 (t,  $J=7.8$  Hz, 1H), 6.51-6.64 (m, 2H), 4.43 (br s, 2H), 2.52 (s, 3H).  $^{13}\text{C}$  NMR (100 MHz,  $\text{CDCl}_3$ )  $\delta$  (ppm) 23.9, 112.0, 113.4, 120.8, 127.6, 138.7, 144.5.

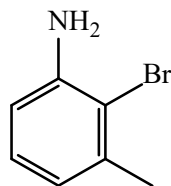

**4-bromo-3-methylaniline (4b):** brown solid (173 mg, 93%). Melting point = 79-81 °C.  $^1\text{H}$  NMR (400 MHz,  $\text{CDCl}_3$ )  $\delta$  (ppm) 7.19 (d,  $J=10$  Hz, 1H), 6.66 (s, 1H), 6.32 (d,  $J=10$  Hz, 1H), 3.59 (s, 2H), 2.38 (s,  $\text{CH}_3$ , 3H).  $^{13}\text{C}$  NMR (100 MHz,  $\text{CDCl}_3$ )  $\delta$  (ppm) 22.4, 112.2, 114.5, 117.4, 132.5, 138.1, 145.3.

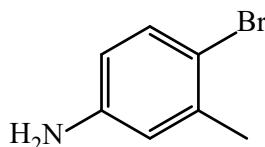

**4-Methoxyaniline (5b):** Grey solid (117 mg, 95%). Melting point = 57-59 °C.  $^1\text{H}$  NMR (400 MHz,  $\text{CDCl}_3$ )  $\delta$  (ppm) 6.73 (d,  $J=8.8$  Hz, 2H), 6.62 (d,  $J=8.8$  Hz, 2H), 3.85 (s, 3H), 3.34 (br s, 2H).  $^{13}\text{C}$  NMR (100 MHz,  $\text{CDCl}_3$ )  $\delta$  (ppm) 56.3, 114.4, 116.5, 138.6, 152.1.

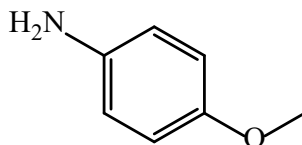

**4-aminophenol (6b):** grey solid (99 mg, 91%). Melting point = 183-188 °C.  $^1\text{H}$  NMR (400 MHz,  $\text{DMSO}-d_6$ )  $\delta$  (ppm) 9.10 (br s, 1H), 6.41-6.53 (m, 4H), 4.29 (br s, 2H).  $^{13}\text{C}$  NMR (100 MHz,  $\text{DMSO}-d_6$ )  $\delta$  (ppm) 115.3, 116.1, 141.1, 148.0.

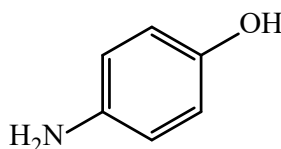

**4-aminobenzonitrile (7b):** white solid (114 mg, 97%). Melting point = 80-84 °C. <sup>1</sup>H NMR (400 MHz, CDCl<sub>3</sub>) δ (ppm) 7.49 (d, *J*=8.8 Hz, 2H), 6.57 (d, *J*=8.8 Hz, 2H), 4.67 (br s, 2H). <sup>13</sup>C NMR (100 MHz, CDCl<sub>3</sub>) δ (ppm) 100.1, 114.5, 120.3, 133.4, 150.4.

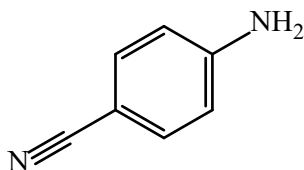

**1H-indazol-5-amine (8b):** brown solid (120 mg, 90%). Melting point = 131-132 °C. <sup>1</sup>H NMR (400 MHz, DMSO-*d*<sub>6</sub>) δ (ppm) 12.53 (br s, 1H), 7.57 (s, 1H), 7.15 (d, *J*=8.6, 1H), 6.68-6.81 (m, 2H), 5.04 (br s, 2H). <sup>13</sup>C NMR (100 MHz, DMSO-*d*<sub>6</sub>) δ (ppm) 99.3, 110.9, 111.6, 117.7, 123.9, 131.6, 142.7.

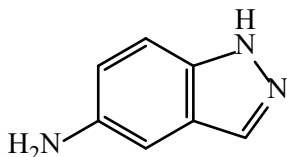

**Quinolin-6-amine (9b):** brown solid (141 mg, 98%). Melting point = 115-117 °C. <sup>1</sup>H NMR (400 MHz, CDCl<sub>3</sub>) δ (ppm) 8.59 (dd, *J*=4, 1.4 Hz, 1H), 7.85-7.97 (m, 2H), 7.27 (dd, *J*=8, 4.1 Hz, 1H), 7.21 (dd, *J*=8.8, 2.4 Hz, 1H), 6.90 (d, 2.4 Hz, 1H), 3.88 (br s, 2H). <sup>13</sup>C NMR (100 MHz, CDCl<sub>3</sub>) δ (ppm) 107.5, 121.5, 122.5, 129.9, 130.9, 133.7, 143.4, 144.5, 147.0.

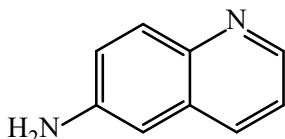

**6-Chloro-5-methylpyridin-3-amine (10b):** brown solid (133 mg, 94%). Melting point = 90-94 °C. <sup>1</sup>H NMR (400 MHz, CDCl<sub>3</sub>) δ (ppm) 7.58 (d, *J*=8.2 Hz, 1H), 6.84 (d, *J*=2,8 Hz, 1H), 3.79 (br s, 2H), 2.38 (s, 2H). <sup>13</sup>C NMR (100 MHz, CDCl<sub>3</sub>) δ (ppm) 19.1, 123.5, 125.5, 135.4, 137.6, 138.9.

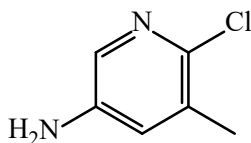

**2,6-Dichloropyridin-3-amine (11b):** brown solid (134 mg, 82%). Melting point = 119-122 °C. <sup>1</sup>H NMR (400 MHz, CDCl<sub>3</sub>) δ (ppm) 7.13 (d, *J*=8.4 Hz, 1H), 7.02 (d, *J*=8.4 Hz, 1H), 4.17 (br s, 2H). <sup>13</sup>C NMR (100 MHz, CDCl<sub>3</sub>) δ (ppm) 123.7, 125.2, 134.5, 138.2, 139.0.

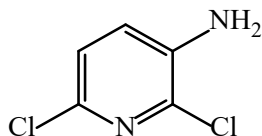

**12. 2-Chloro-6-methoxypyridin-3-amine (12b):** brown solid (135 mg, 85%). Melting point = 44-47 °C. <sup>1</sup>H NMR (400 MHz, CDCl<sub>3</sub>) δ (ppm) 7.06 (d, *J*=8.2 Hz, 1H), 6.46 (d, *J*=8.2 Hz, 1H), 3.82 (s, 3H) 3.52 (br s, 2H). <sup>13</sup>C NMR (100 MHz, CDCl<sub>3</sub>) δ (ppm) 54.4, 110.7, 128.8, 132.8, 133.8, 156.0.

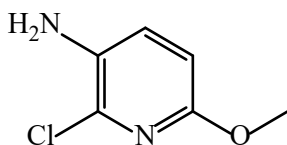

### $^1\text{H}$ NMR (400 MHz, $\text{CDCl}_3$ ) spectrum of **1b**

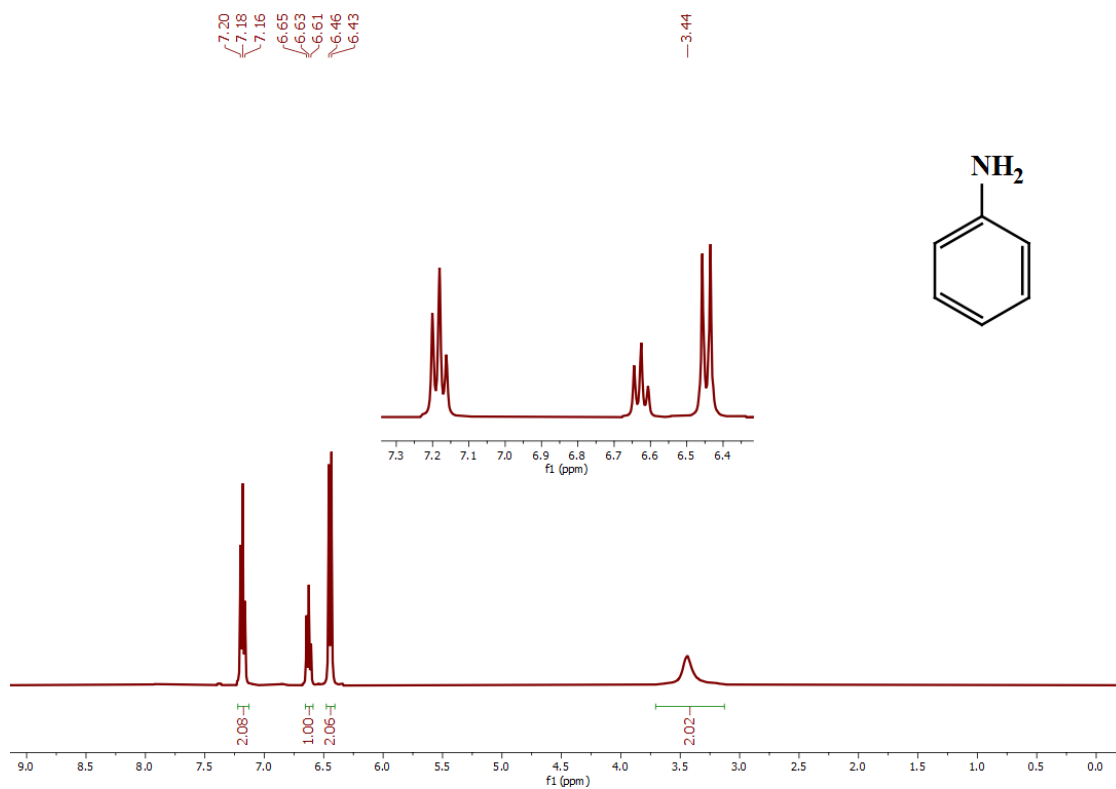

Figure S2:  $^1\text{H}$  NMR (400 MHz,  $\text{CDCl}_3$ ) Spectrum of Aniline (**1b**).

### $^{13}\text{C}$ NMR (100 MHz, $\text{CDCl}_3$ ) spectrum of **1b**

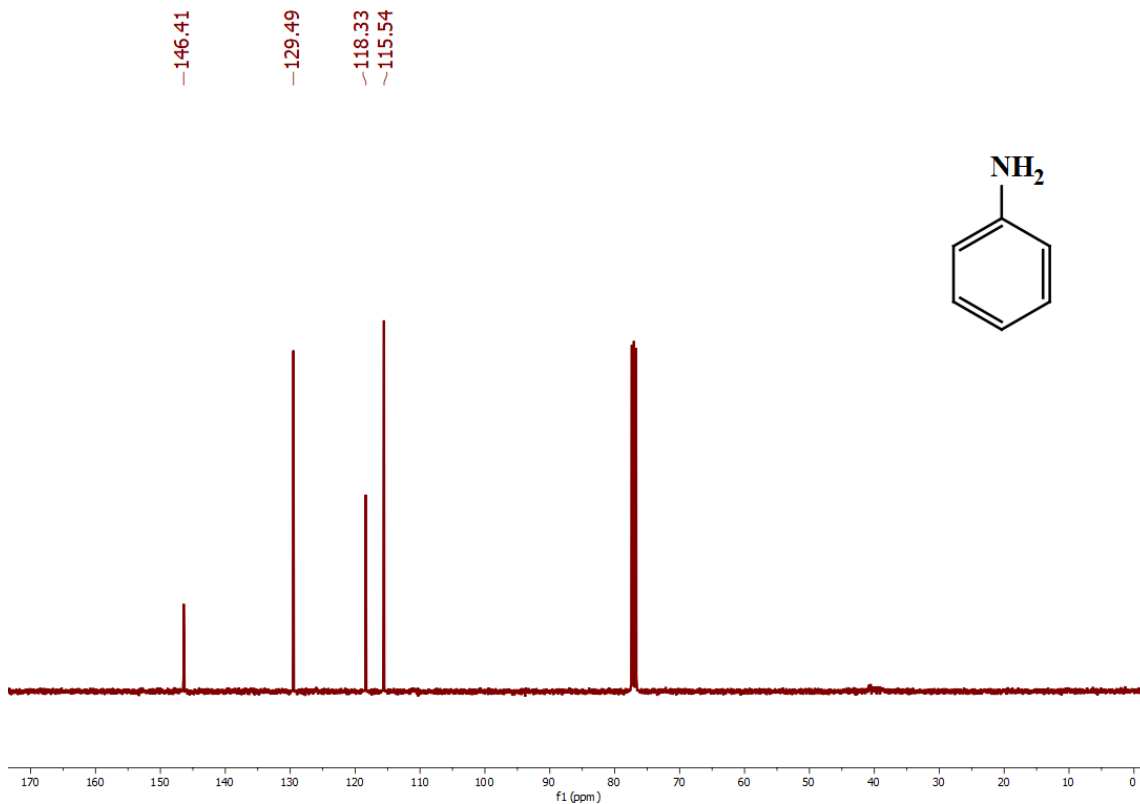

Figure S3:  $^{13}\text{C}$  NMR (100 MHz,  $\text{CDCl}_3$ ) Spectrum of Aniline (**1b**).

**$^1\text{H}$  NMR (400 MHz,  $\text{CDCl}_3$ ) spectrum of 2b**

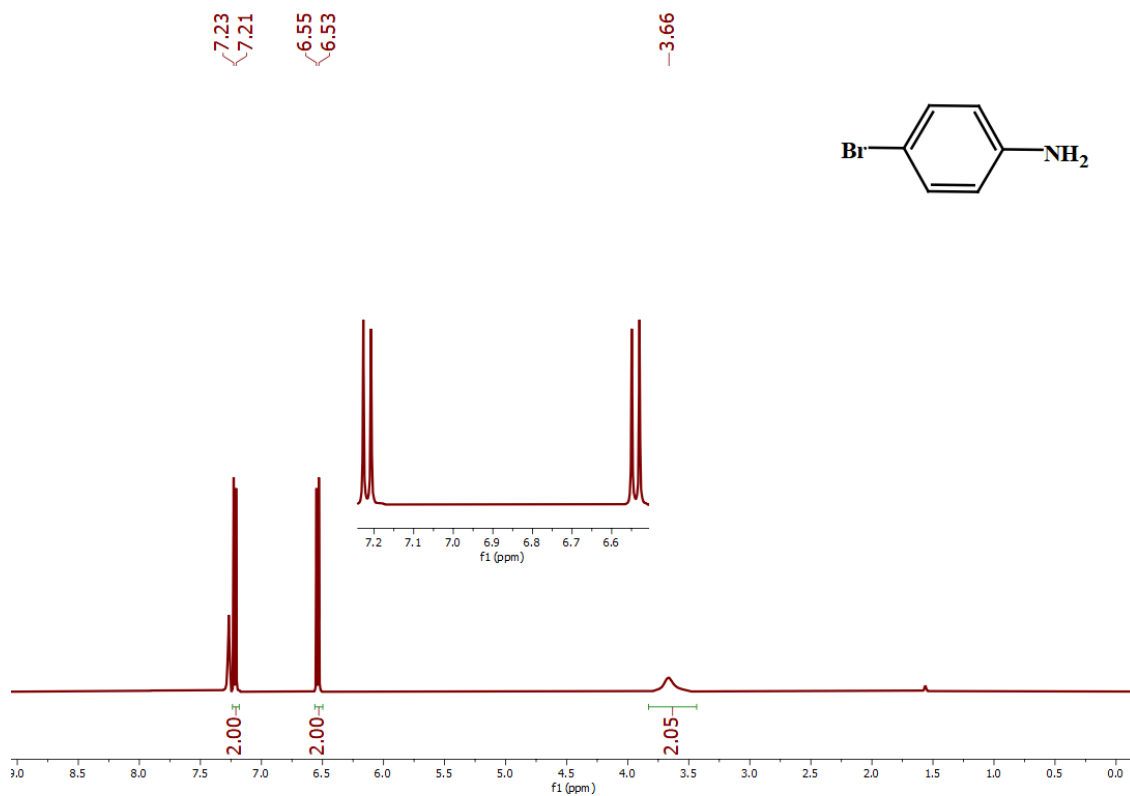

**Figure S4:**  $^1\text{H}$  NMR (400 MHz,  $\text{CDCl}_3$ ) Spectrum of 4-bromoaniline (2b).

**$^{13}\text{C}$  NMR (100 MHz,  $\text{CDCl}_3$ ) spectrum of 2b**

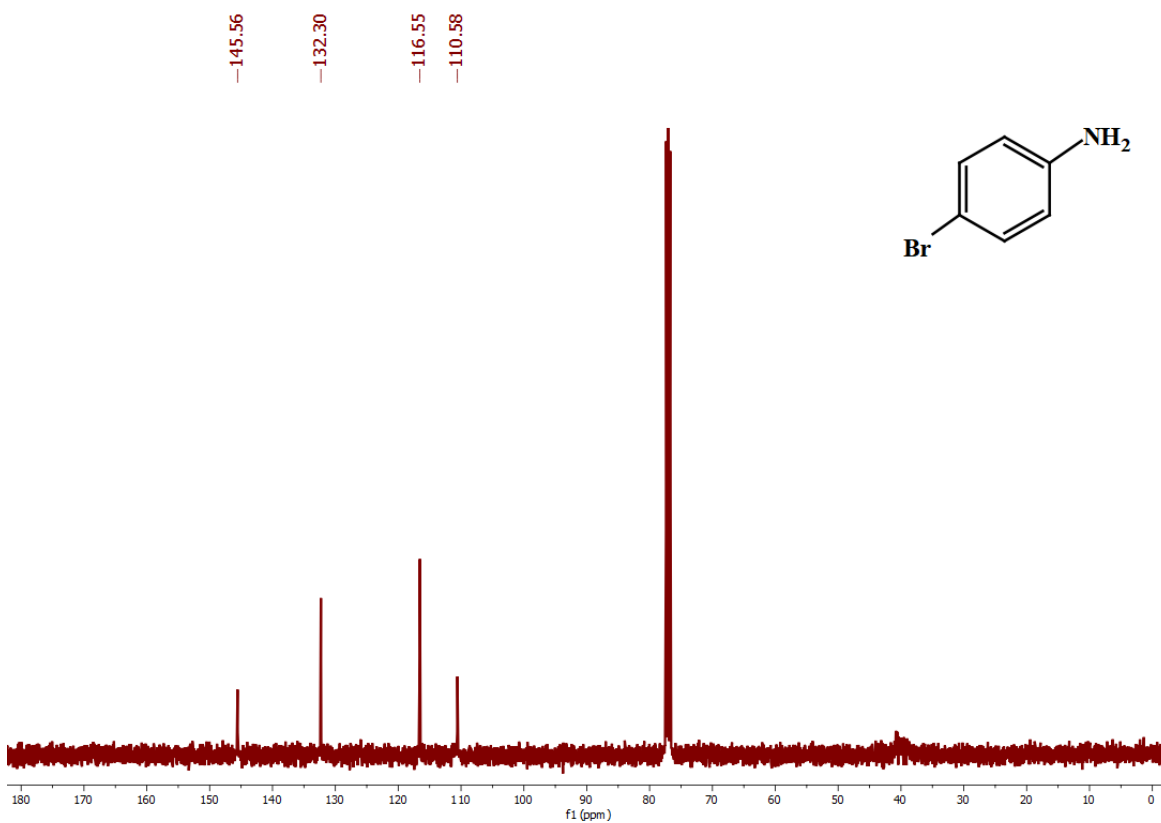

**Figure S5:**  $^{13}\text{C}$  NMR (100 MHz,  $\text{CDCl}_3$ ) Spectrum of 4-bromoaniline (2b).

**<sup>1</sup>H NMR (400 MHz, CDCl<sub>3</sub>) spectrum of 3b**

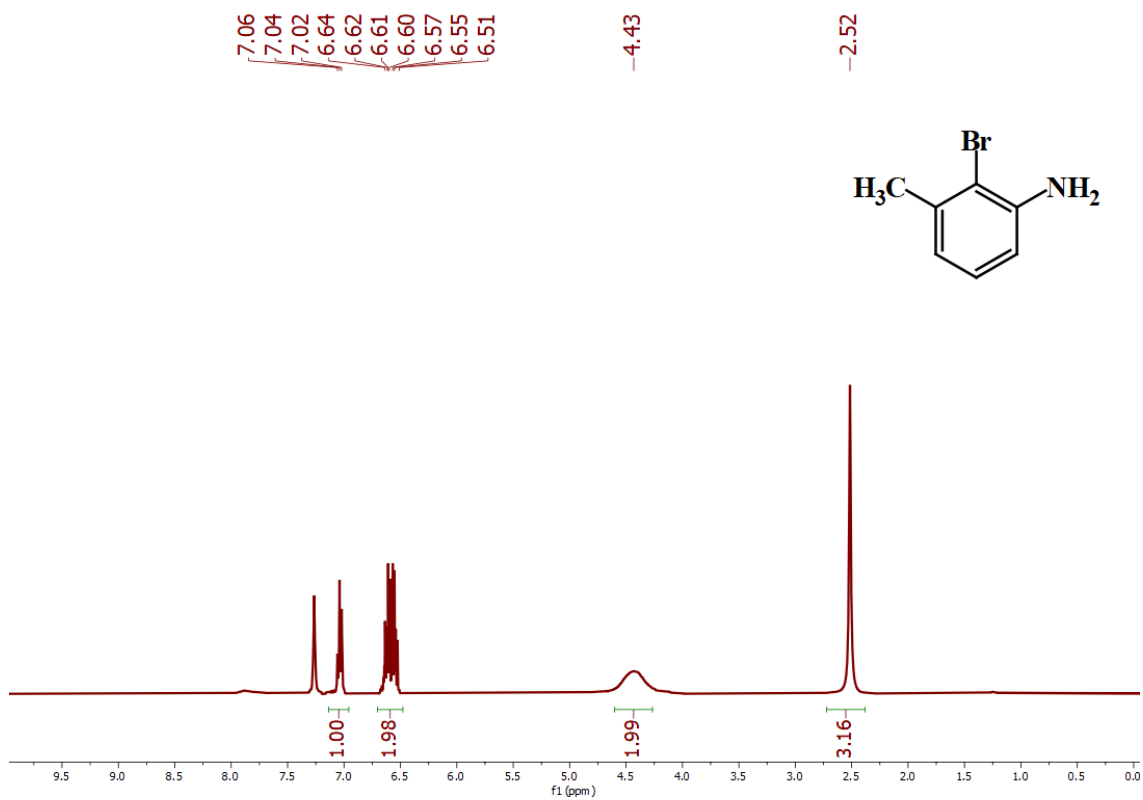

**Figure S6:** <sup>1</sup>H NMR (400 MHz, CDCl<sub>3</sub>) Spectrum of 2-Bromo-3-methylaniline (**3b**).

**<sup>13</sup>C NMR (100 MHz, CDCl<sub>3</sub>) spectrum of 3b**

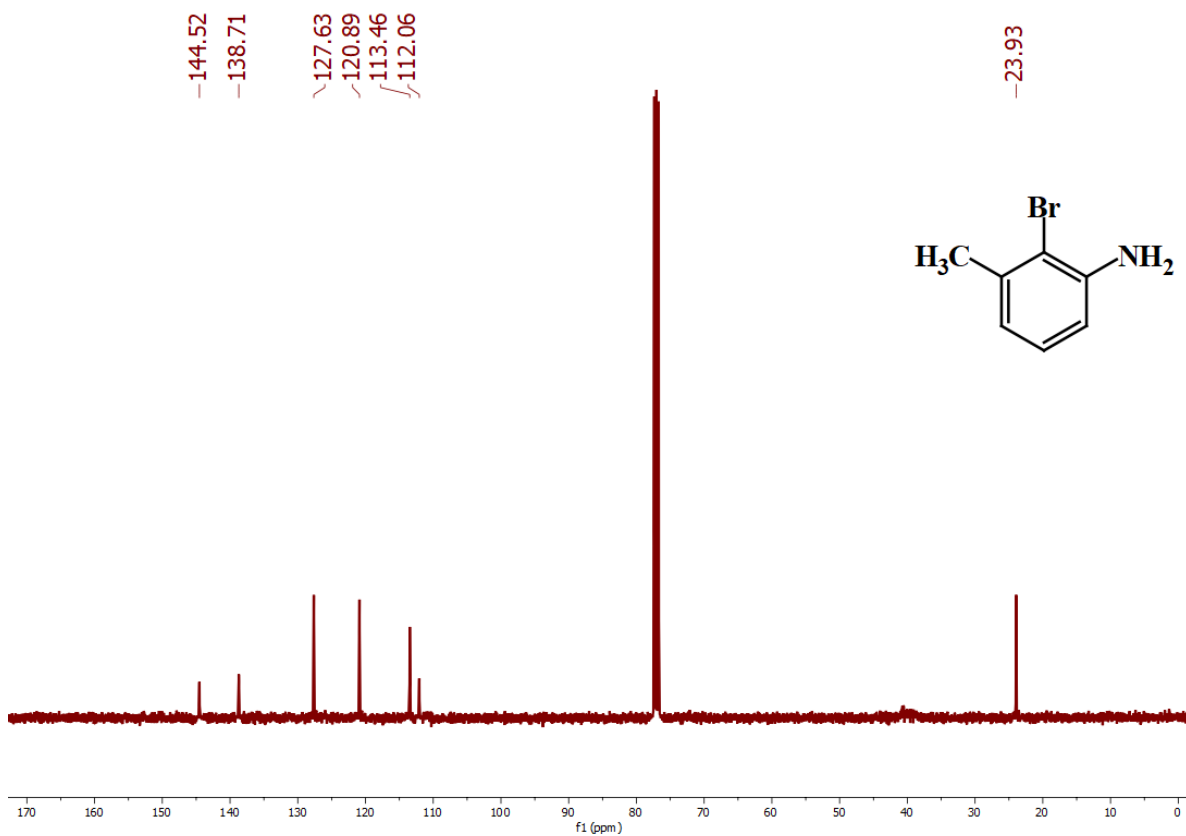

**Figure S7:** <sup>13</sup>C NMR (100 MHz, CDCl<sub>3</sub>) Spectrum of 2-Bromo-3-methylaniline (**3b**).

### $^1\text{H}$ NMR (400 MHz, $\text{CDCl}_3$ ) spectrum of 4b

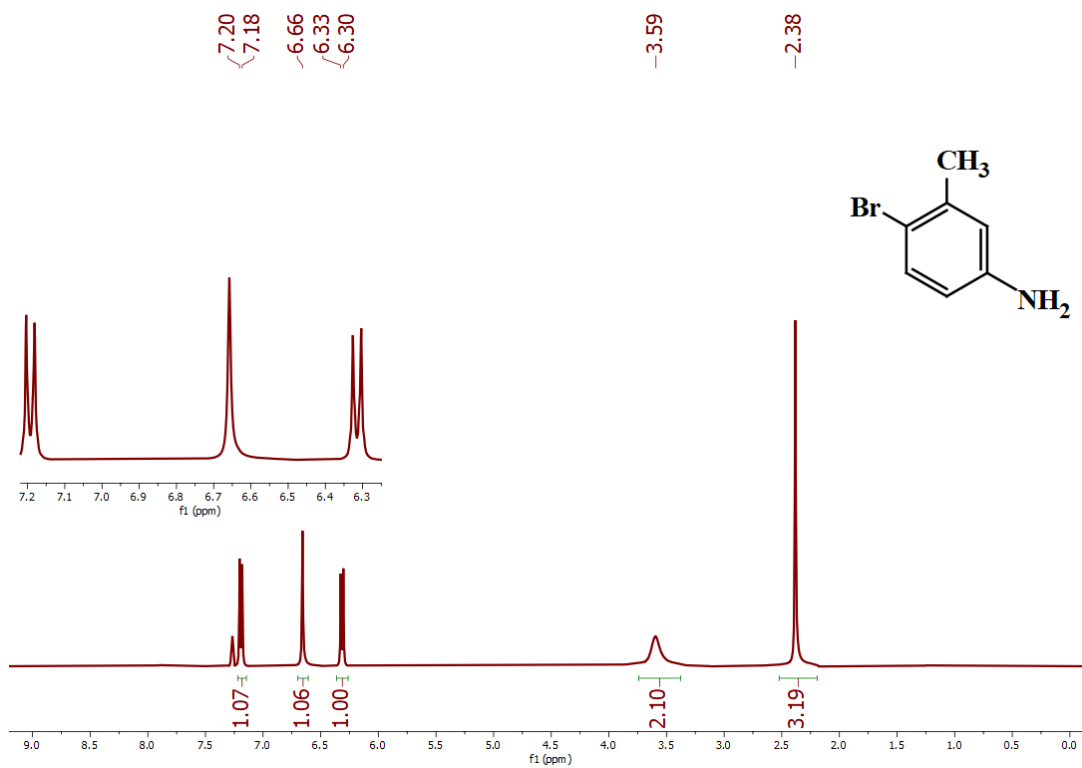

Figure S8:  $^1\text{H}$  NMR (400 MHz,  $\text{CDCl}_3$ ) Spectrum of 4-bromo-3-methylaniline (4b).

### $^{13}\text{C}$ NMR (100 MHz, $\text{CDCl}_3$ ) spectrum of 4b

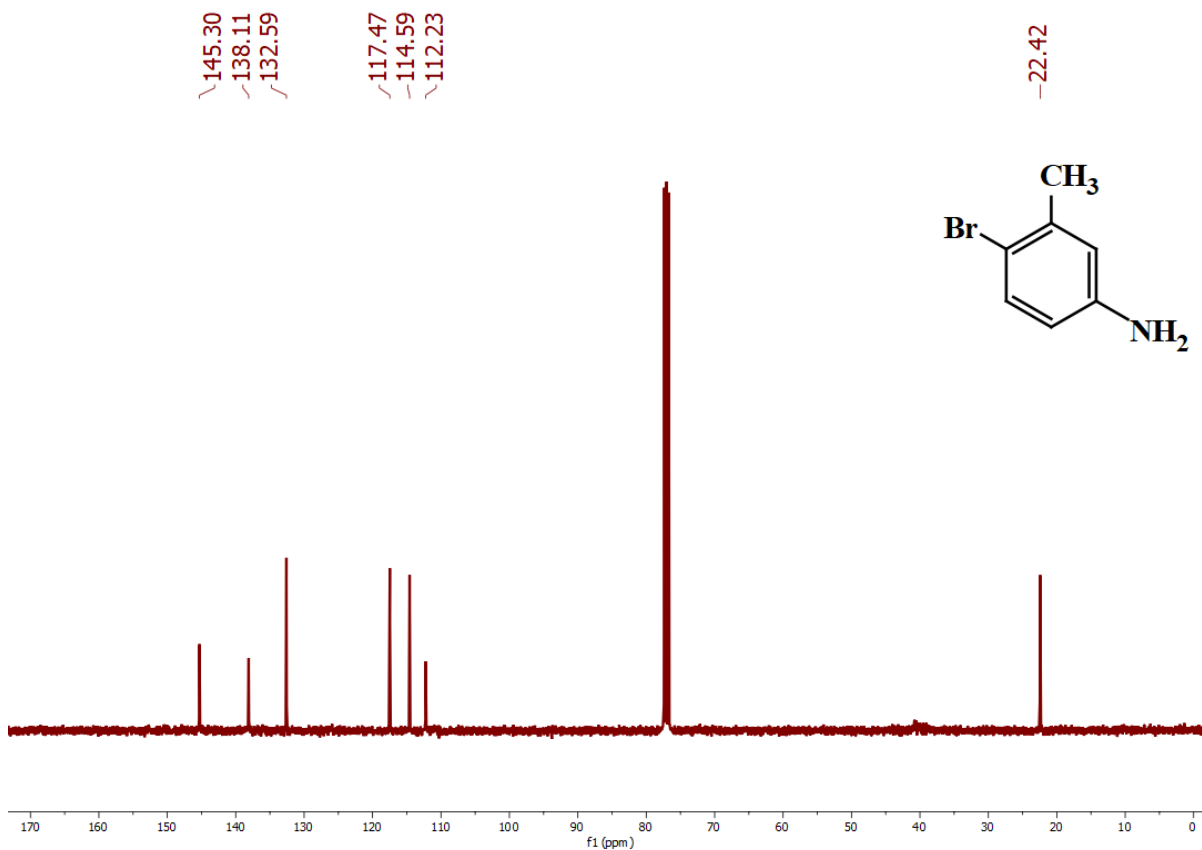

Figure S9:  $^{13}\text{C}$  NMR (100 MHz,  $\text{CDCl}_3$ ) Spectrum of 4-bromo-3-methylaniline (4b).

**$^1\text{H}$  NMR (400 MHz,  $\text{CDCl}_3$ ) spectrum of 5b**

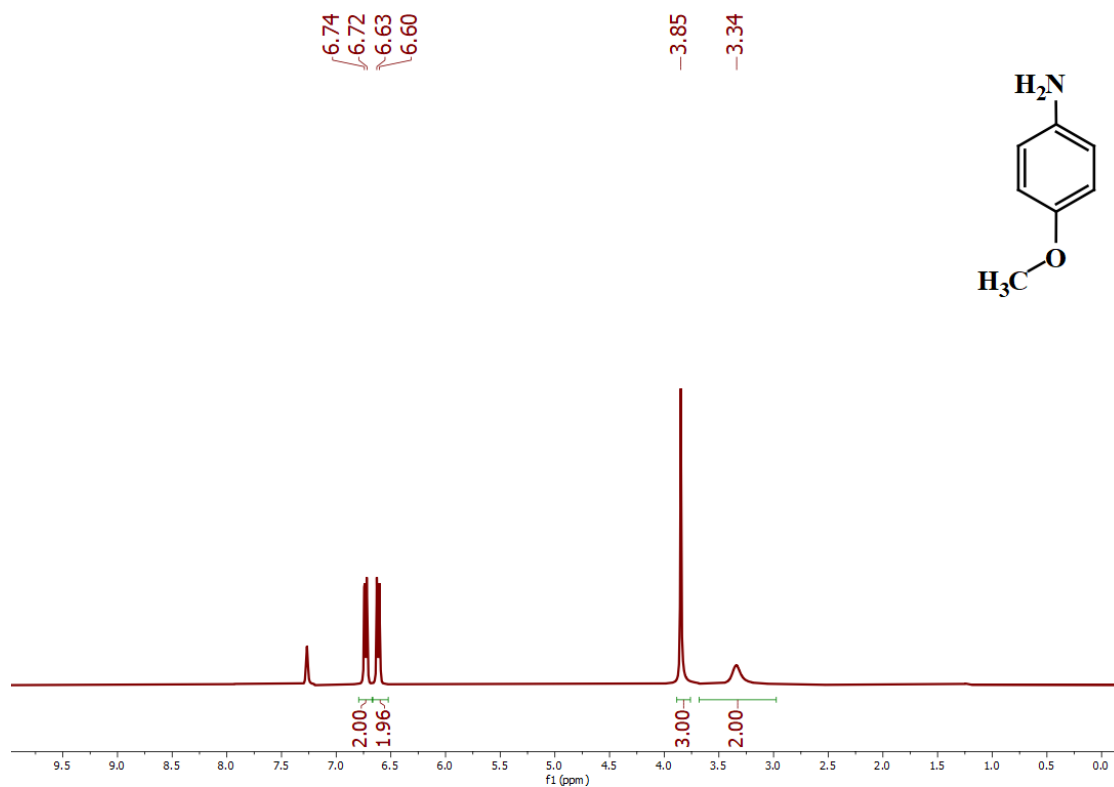

**Figure S10:**  $^1\text{H}$  NMR (400 MHz,  $\text{CDCl}_3$ ) Spectrum of 4-Methoxyaniline (5b).

**$^{13}\text{C}$  NMR (100 MHz,  $\text{CDCl}_3$ ) spectrum of 5b**

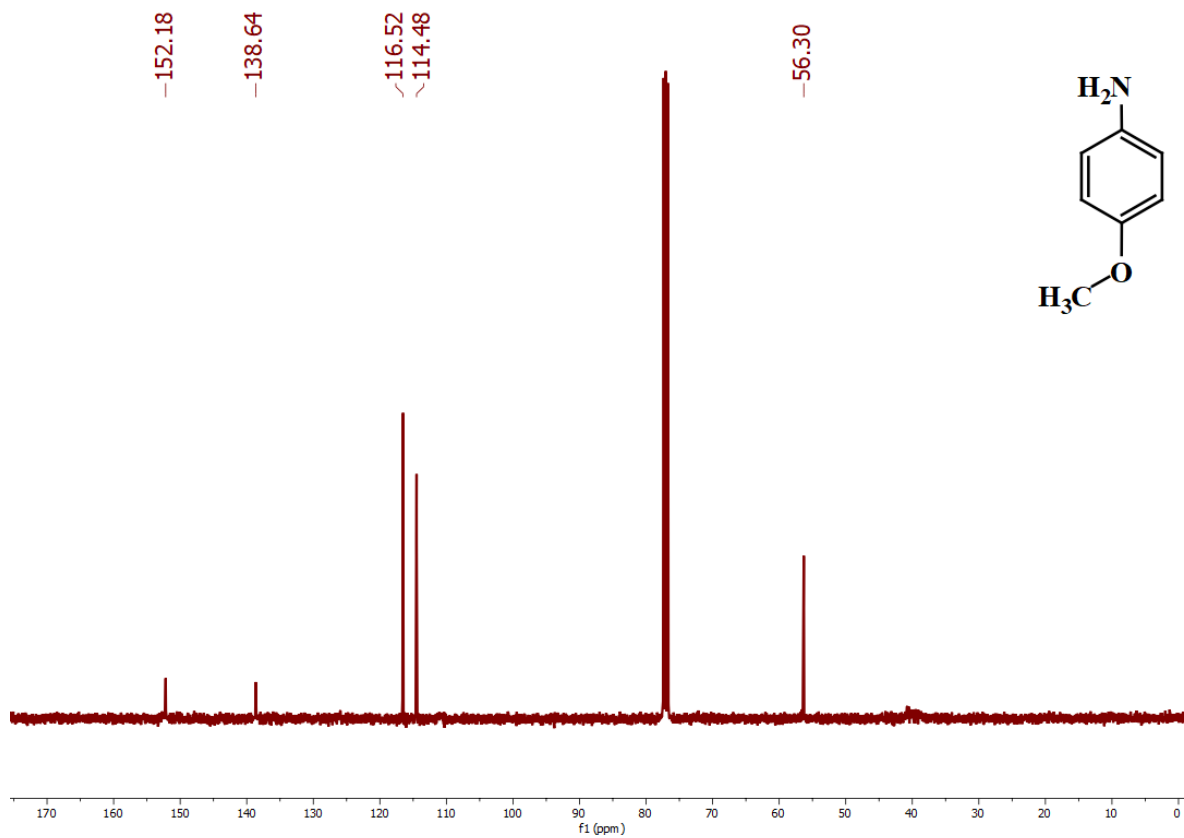

**Figure S11:**  $^{13}\text{C}$  NMR (100 MHz,  $\text{CDCl}_3$ ) Spectrum of 4-Methoxyaniline (5b).



**$^1\text{H}$  NMR (400 MHz,  $\text{DMSO-}d_6$ ) spectrum of 6b**

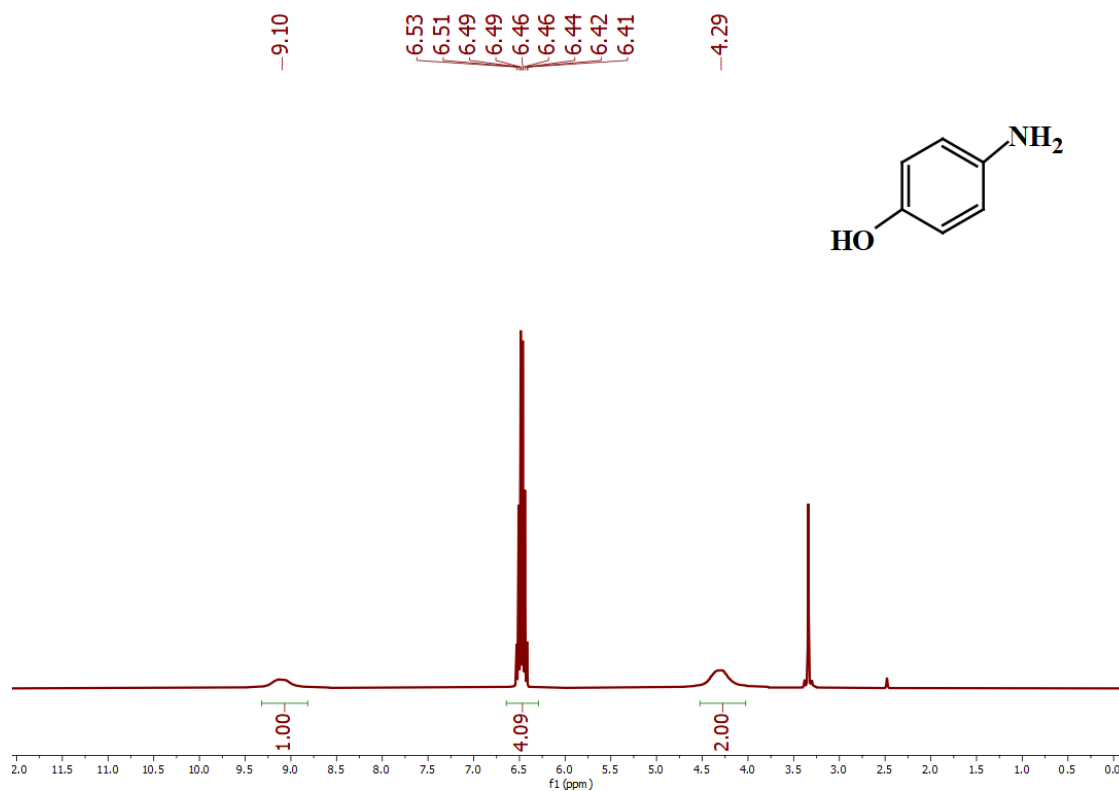

**Figure S12:**  $^1\text{H}$  NMR (400 MHz,  $\text{DMSO-}d_6$ ) Spectrum of 4-aminophenol (6b).

**$^{13}\text{C}$  NMR (100 MHz,  $\text{DMSO-}d_6$ ) spectrum of 6b**

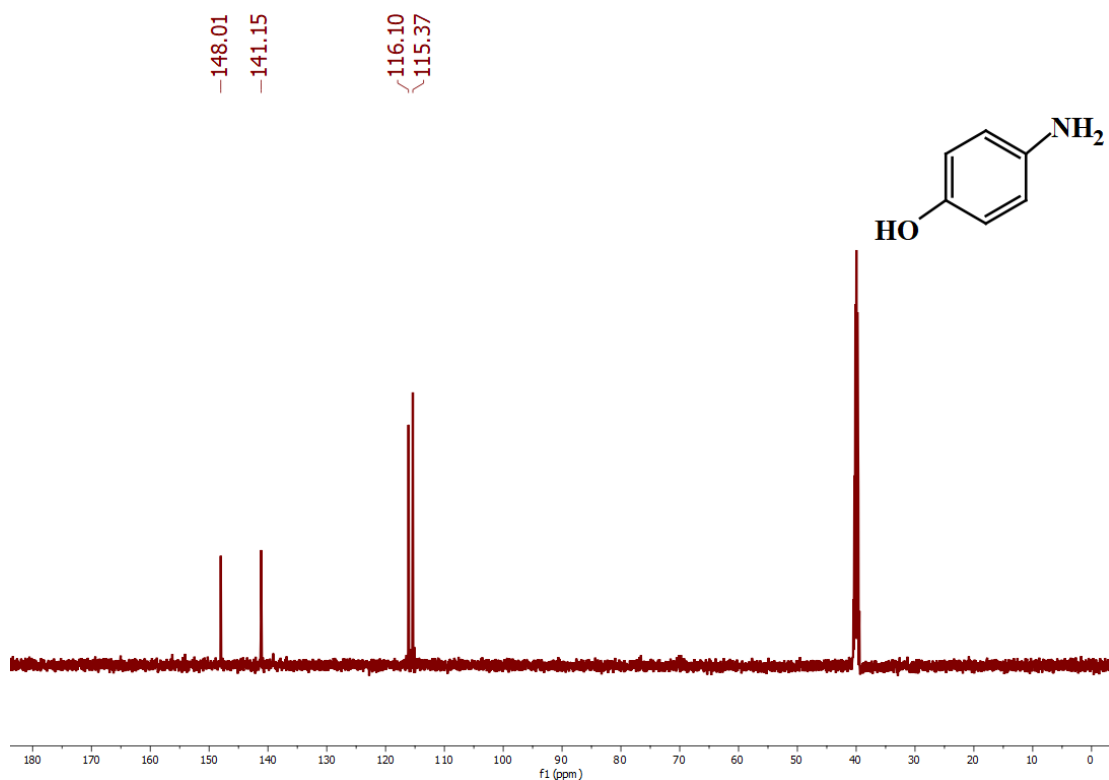

**Figure S13:**  $^{13}\text{C}$  NMR (100 MHz,  $\text{DMSO-}d_6$ ) Spectrum of 4-aminophenol (6b).

**$^1\text{H}$  NMR (400 MHz,  $\text{CDCl}_3$ ) spectrum of 7b**

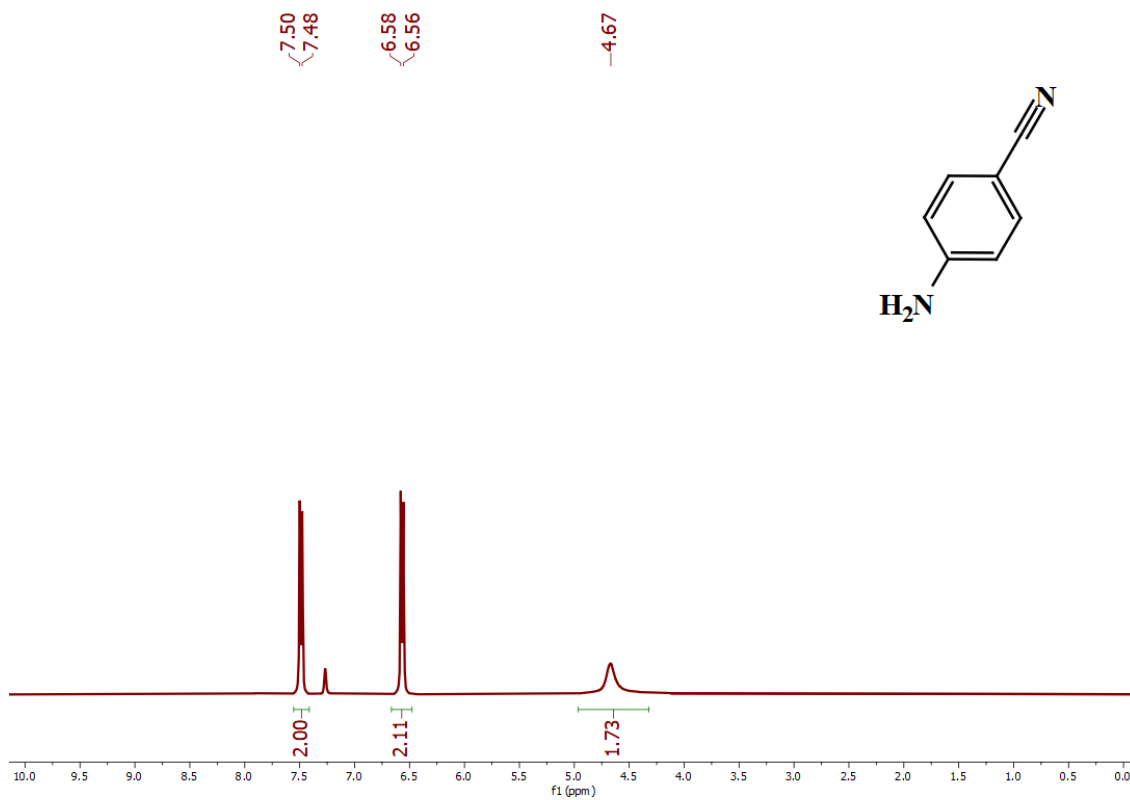

**Figure S14:**  $^1\text{H}$  NMR (400 MHz,  $\text{CDCl}_3$ ) Spectrum of 4-aminobenzonitrile (7b).

**$^{13}\text{C}$  NMR (100 MHz,  $\text{CDCl}_3$ ) spectrum of 7b**

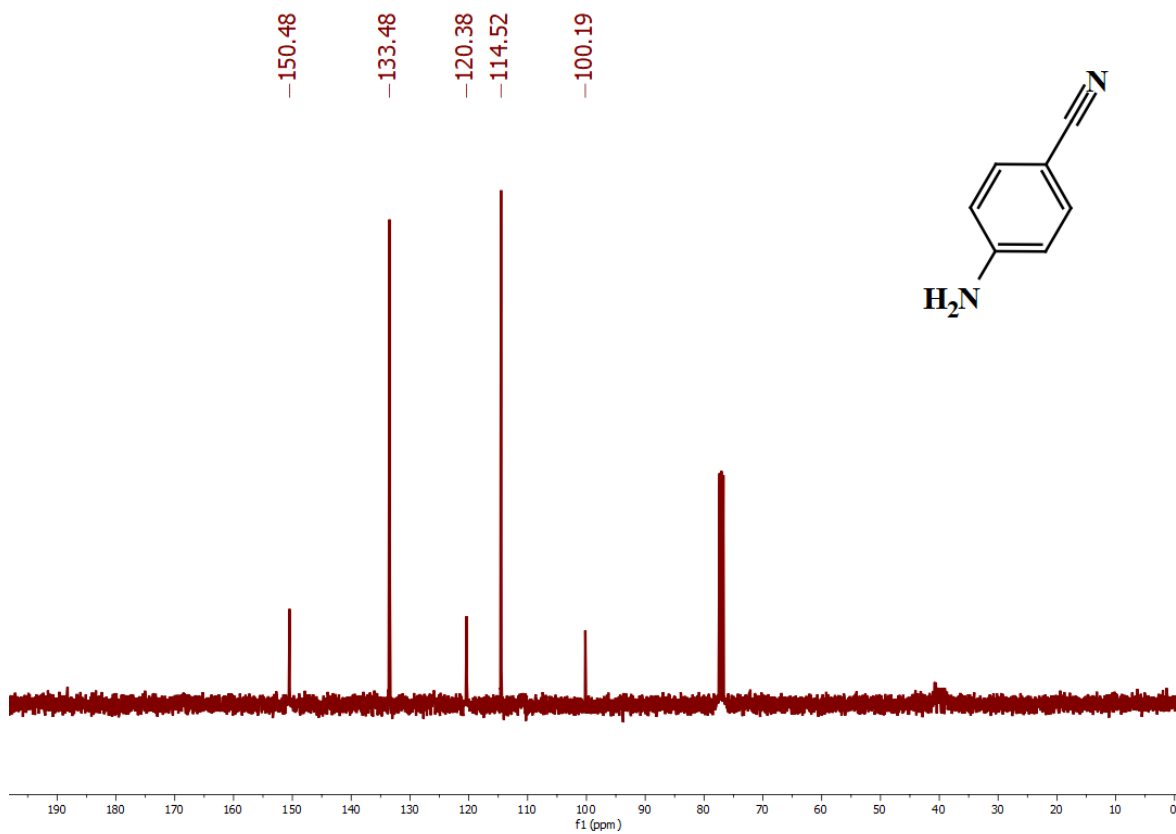

**Figure S15:**  $^{13}\text{C}$  NMR (100 MHz,  $\text{CDCl}_3$ ) Spectrum of 4-aminobenzonitrile (7b).

### <sup>1</sup>H NMR (400 MHz, DMSO-*d*<sub>6</sub>) spectrum of 8b

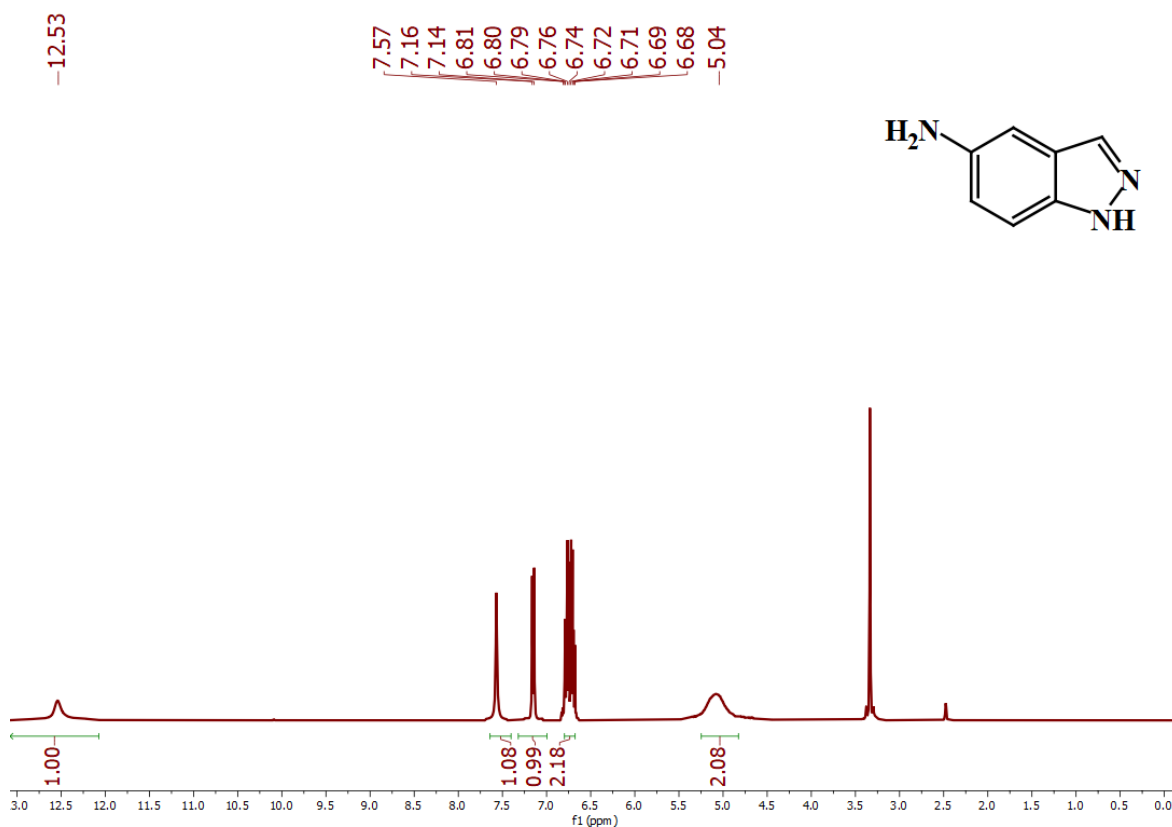

Figure S16: <sup>1</sup>H NMR (400 MHz, DMSO-*d*<sub>6</sub>) Spectrum of 1H-indazol-5-amine (8b).

### <sup>13</sup>C NMR (100 MHz, DMSO-*d*<sub>6</sub>) spectrum of 8b

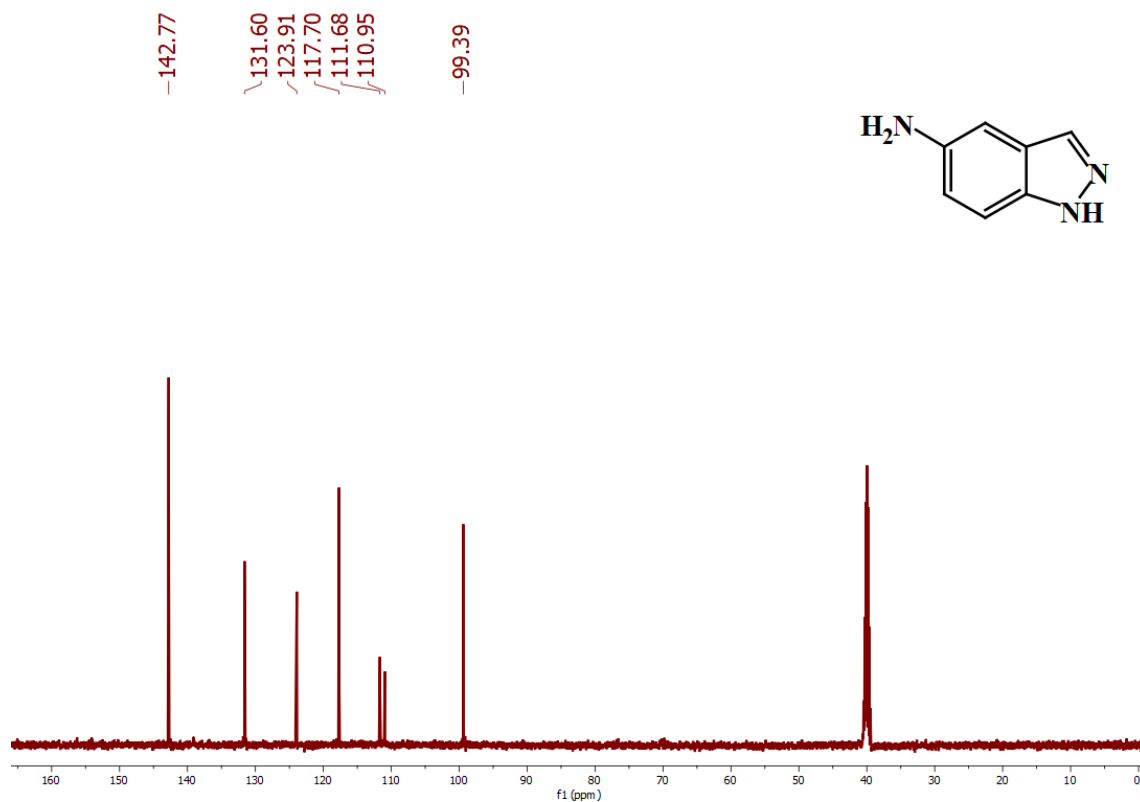

Figure S17: <sup>13</sup>C NMR (100 MHz, DMSO-*d*<sub>6</sub>) Spectrum of 1H-indazol-5-amine (8b).

### <sup>1</sup>H NMR (400 MHz, CDCl<sub>3</sub>) spectrum of 9b

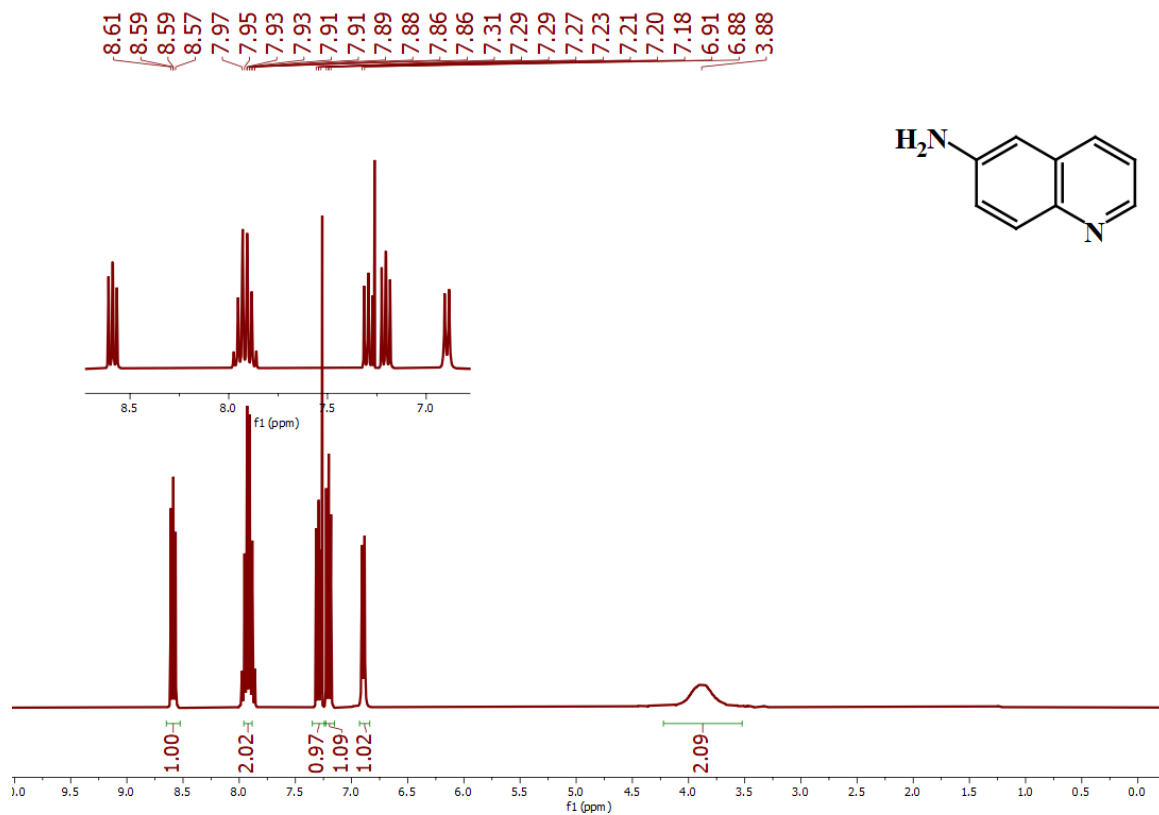

Figure S18: <sup>1</sup>H NMR (400 MHz, CDCl<sub>3</sub>) Spectrum of Quinolin-6-amine (9b).

### <sup>13</sup>C NMR (100 MHz, CDCl<sub>3</sub>) spectrum of 9b

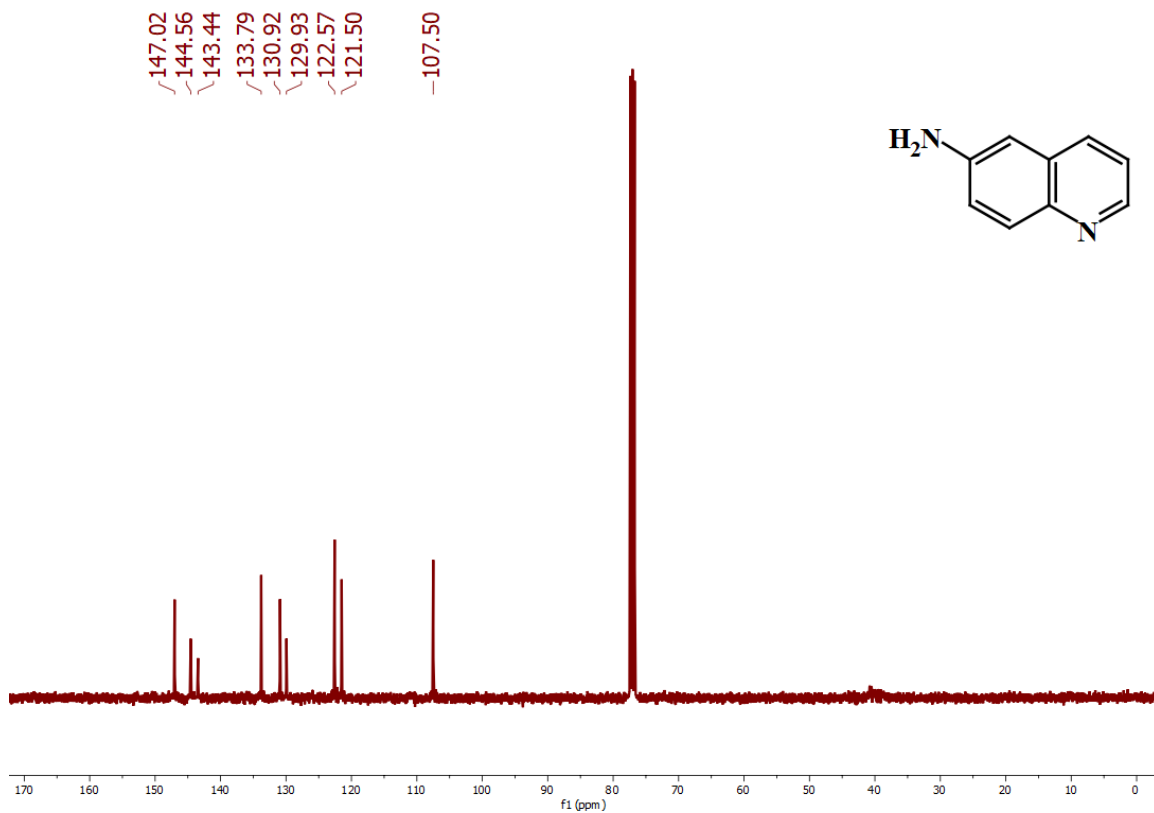

Figure S19: <sup>13</sup>C NMR (100 MHz, CDCl<sub>3</sub>) Spectrum of Quinolin-6-amine (9b).

**<sup>1</sup>H NMR (400 MHz, CDCl<sub>3</sub>) spectrum of 10b**

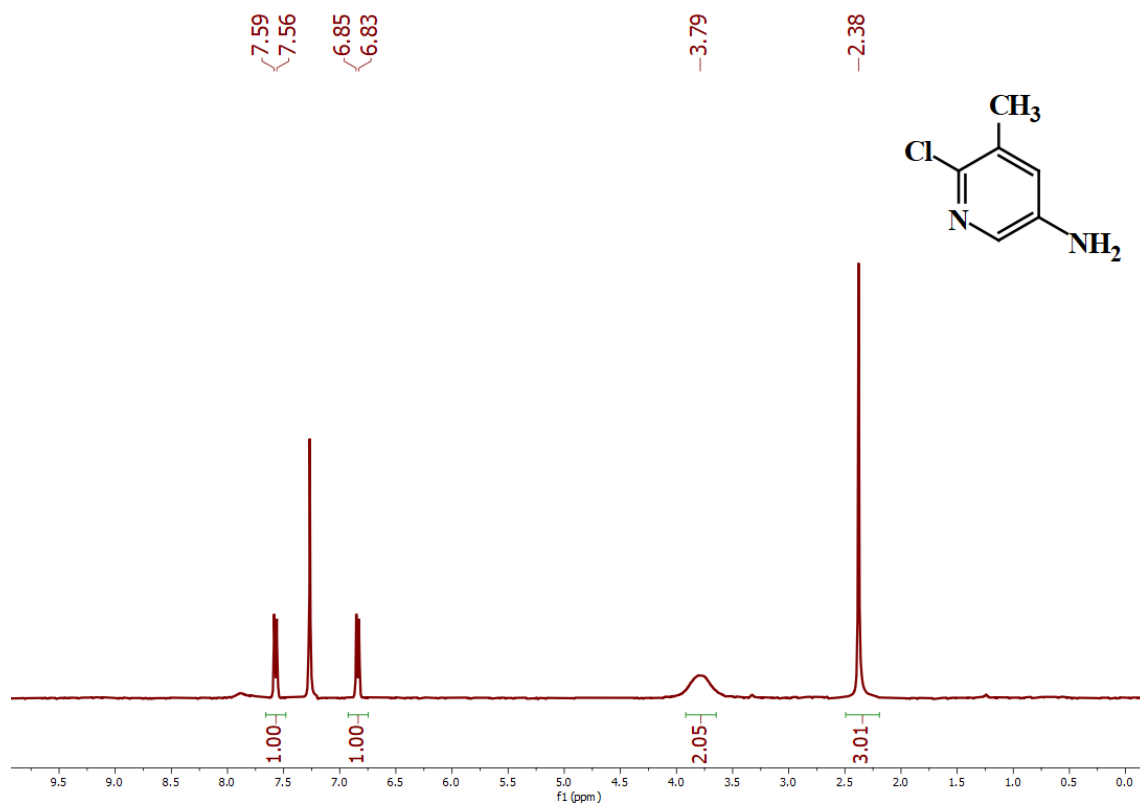

**Figure S20:** <sup>1</sup>H NMR (400 MHz, CDCl<sub>3</sub>) Spectrum of 6-Chloro-5-methylpyridin-3-amine (10b).

**<sup>13</sup>C NMR (100 MHz, CDCl<sub>3</sub>) spectrum of 10b**

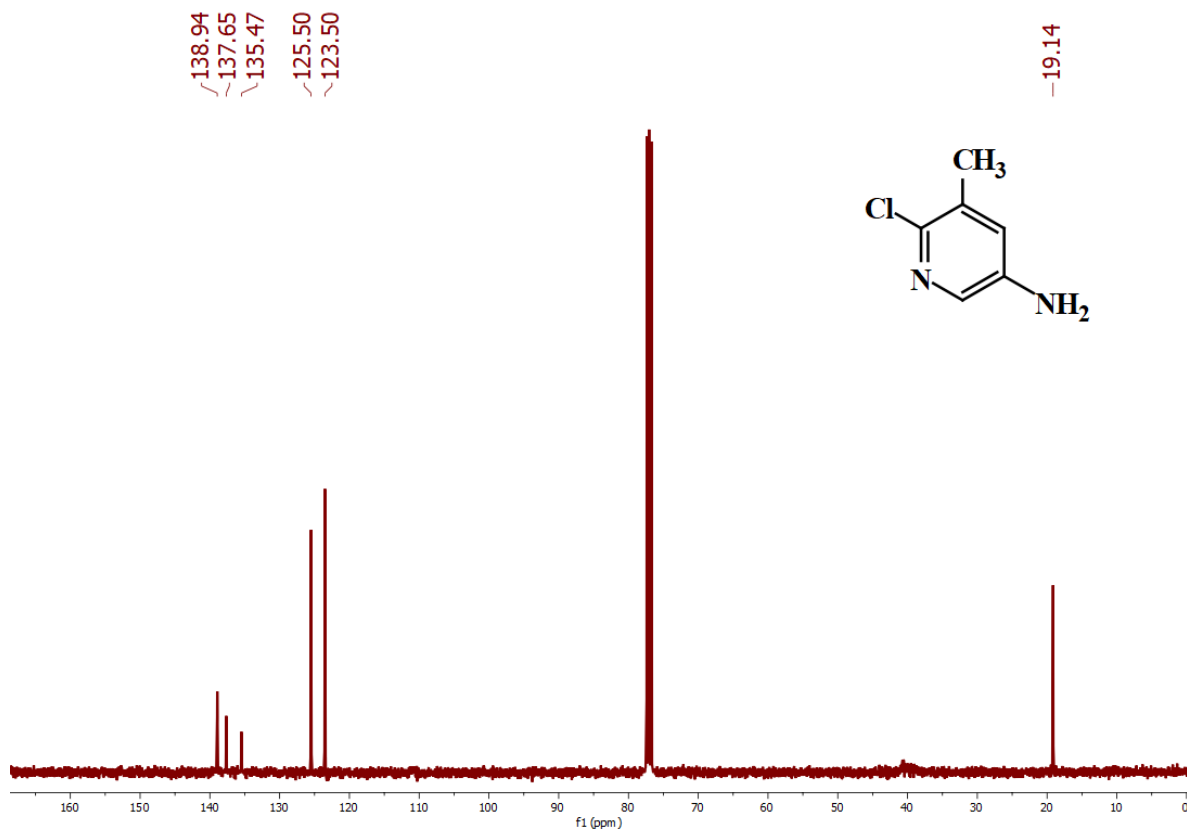

**Figure S21:** <sup>13</sup>C NMR (100 MHz, CDCl<sub>3</sub>) Spectrum of 6-Chloro-5-methylpyridin-3-amine (10b).

### $^1\text{H}$ NMR (400 MHz, $\text{CDCl}_3$ ) spectrum of 11b

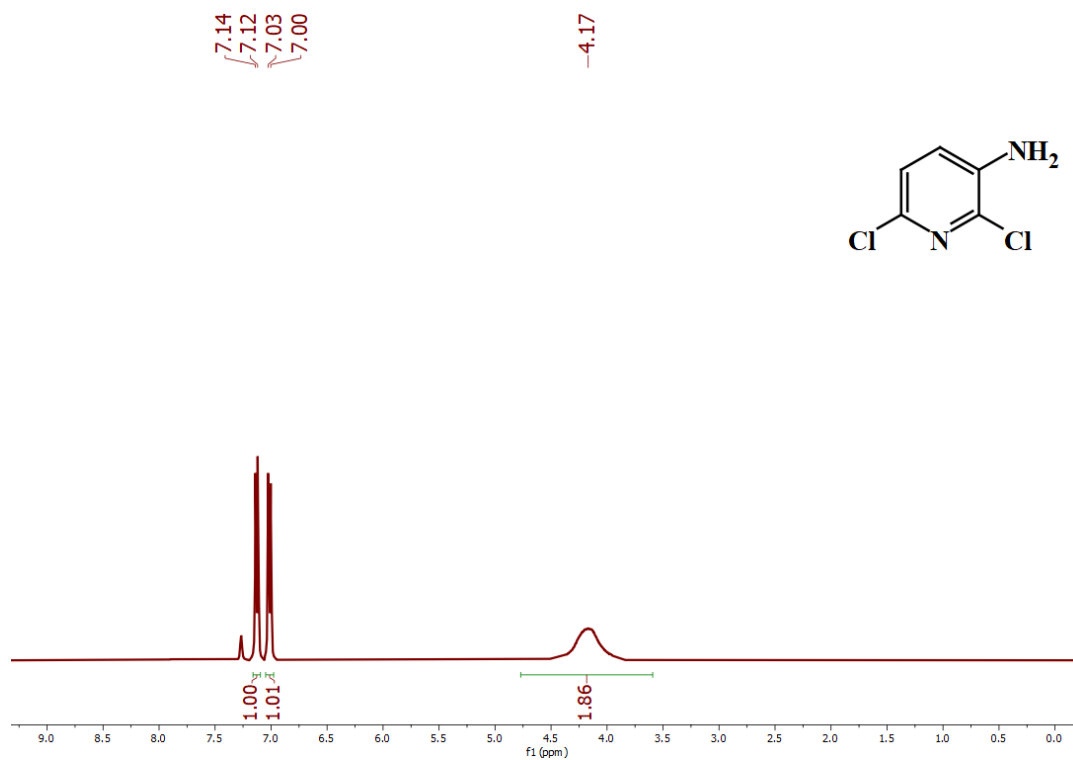

Figure S22:  $^1\text{H}$  NMR (400 MHz,  $\text{CDCl}_3$ ) Spectrum of 2,6-Dichloropyridin-3-amine (11b).

### $^{13}\text{C}$ NMR (100 MHz, $\text{CDCl}_3$ ) spectrum of 11b

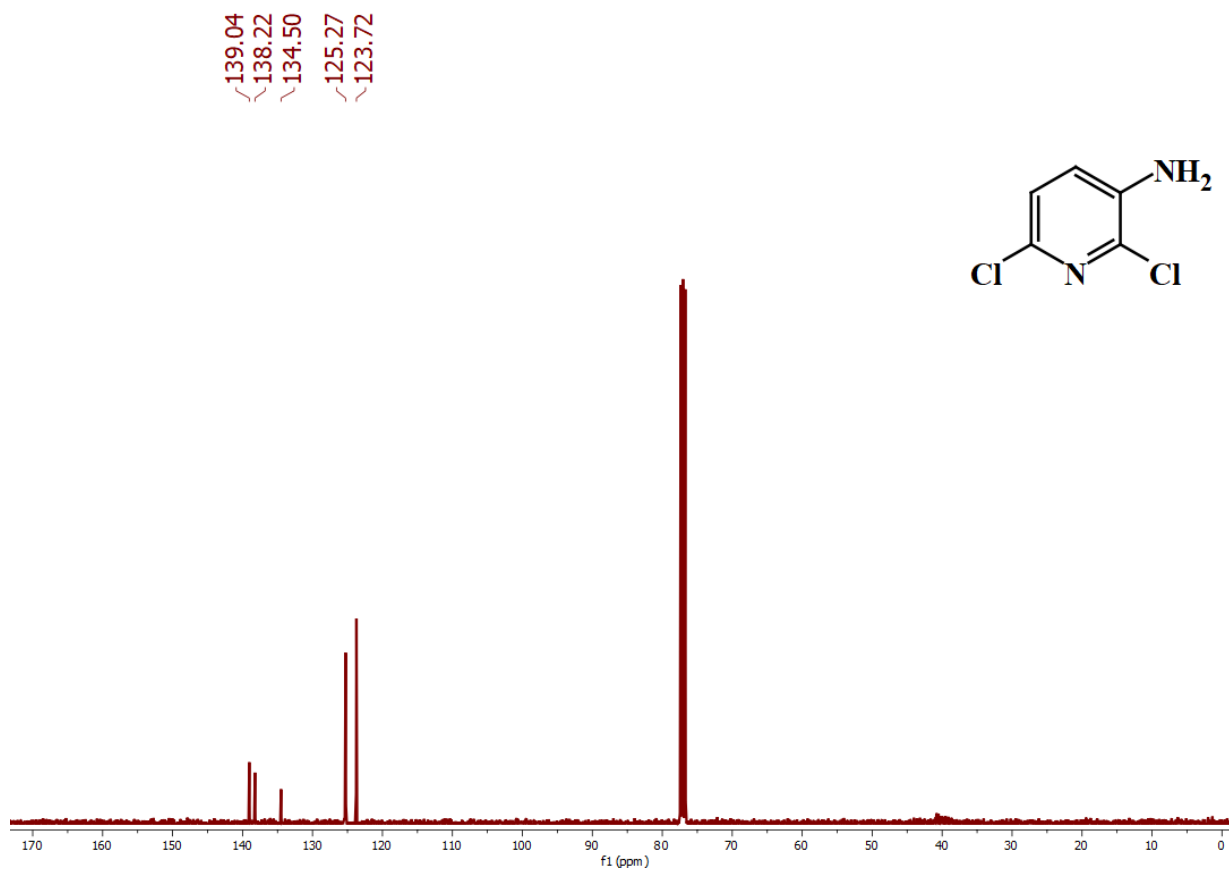

Figure S23:  $^{13}\text{C}$  NMR (100 MHz,  $\text{CDCl}_3$ ) Spectrum of 2,6-Dichloropyridin-3-amine (11b).

**<sup>1</sup>H NMR (400 MHz, CDCl<sub>3</sub>) spectrum of 12b**

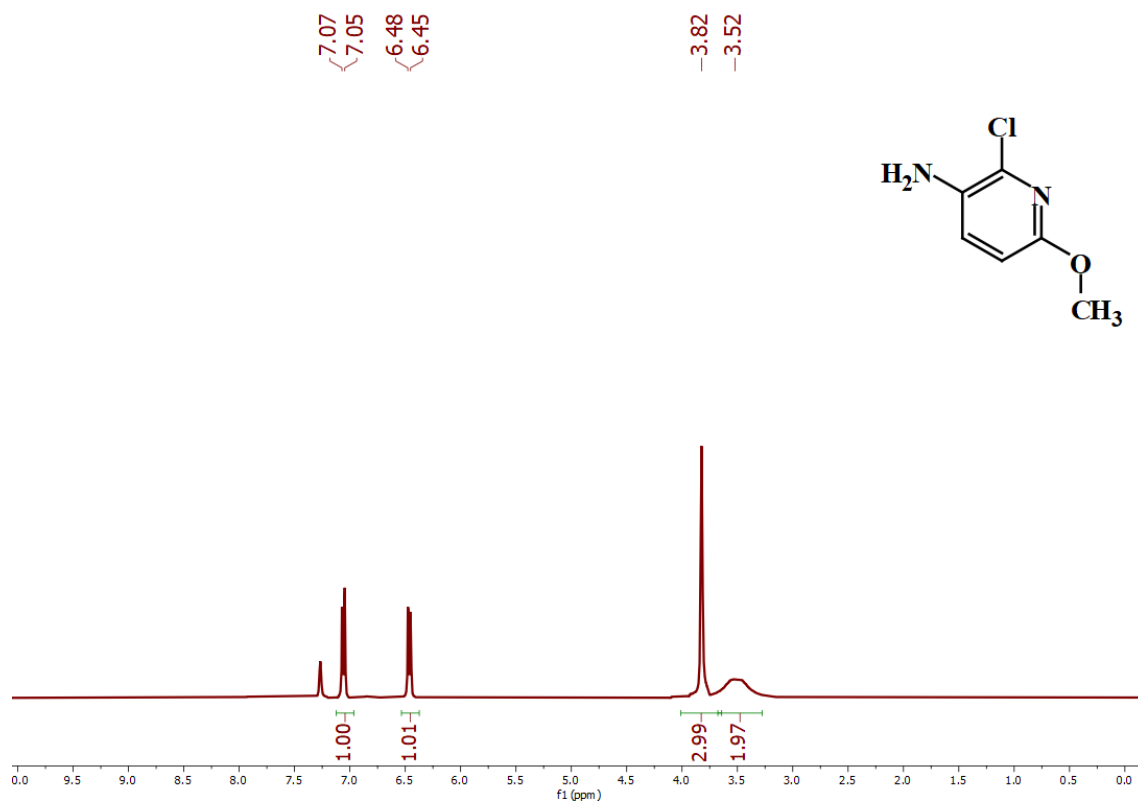

**Figure S24:** <sup>1</sup>H NMR (400 MHz, CDCl<sub>3</sub>) Spectrum of 2-Chloro-6-methoxypyridin-3-amine (12b).

**<sup>13</sup>C NMR (100 MHz, CDCl<sub>3</sub>) spectrum of 12b**

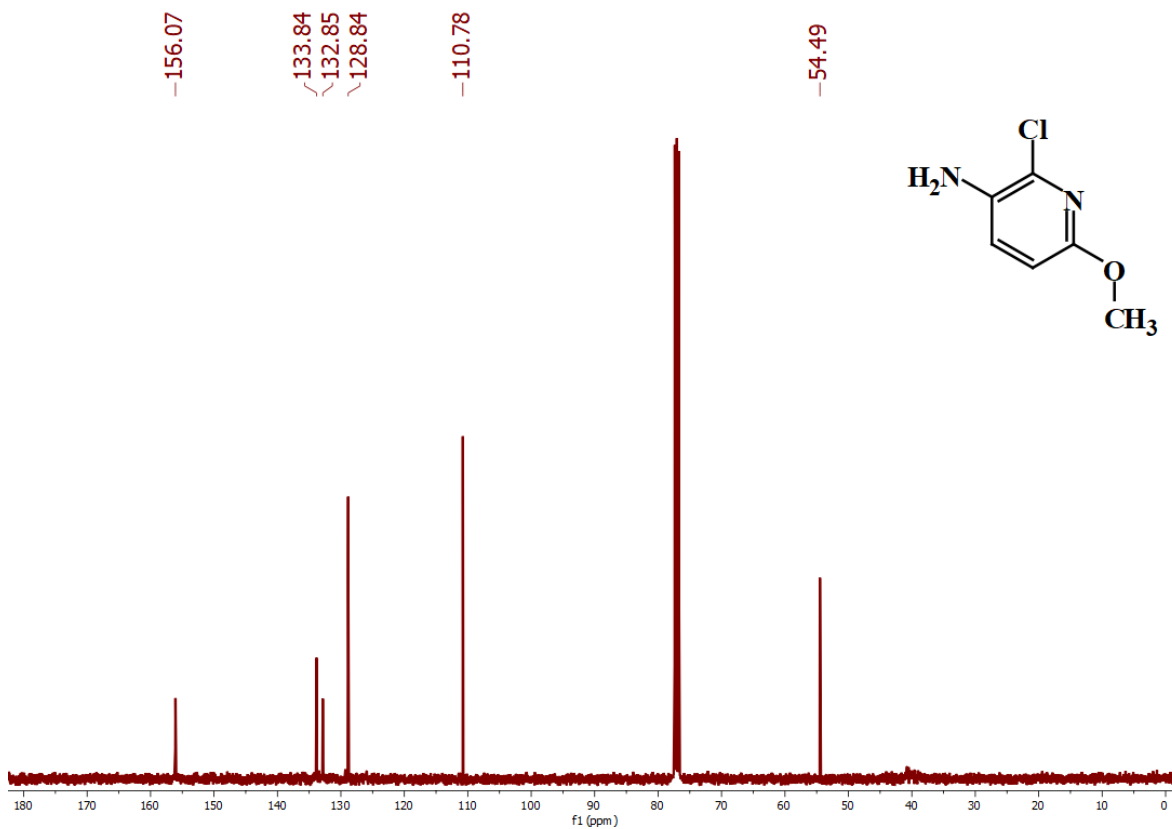

**Figure S25:** <sup>13</sup>C NMR (100 MHz, CDCl<sub>3</sub>) Spectrum of 2-Chloro-6-methoxypyridin-3-amine (12b).
